# Supplementary material for: 3′READS + RIP defines differential Staufen1 binding to alternative 3′UTR isoforms and reveals structures and sequence motifs influencing binding and polysome association
Source: PubMed Central journal article supplement — RNA. 2020 Nov;26(11):1621–36. doi: 10.1261/rna.076133.120 (PMC7566578; doi:10.1261/rna.076133.120), 2020-11

Fig. S1, Zheng, Cho, Wang et al.

A

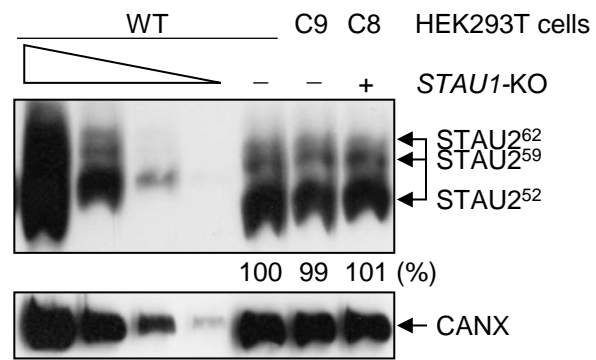

B

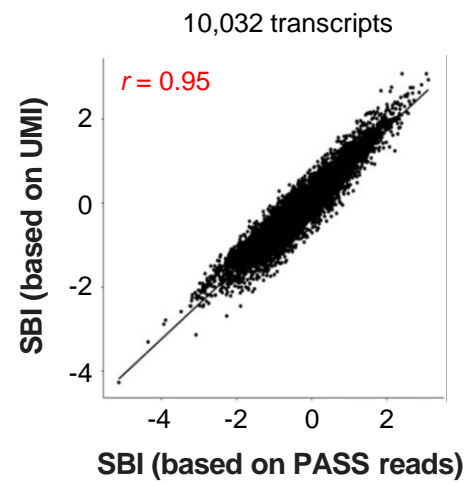

C

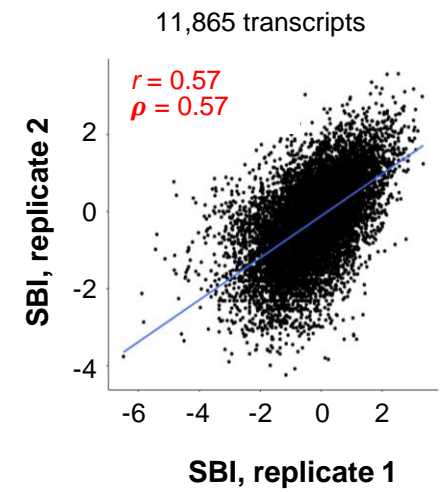

D

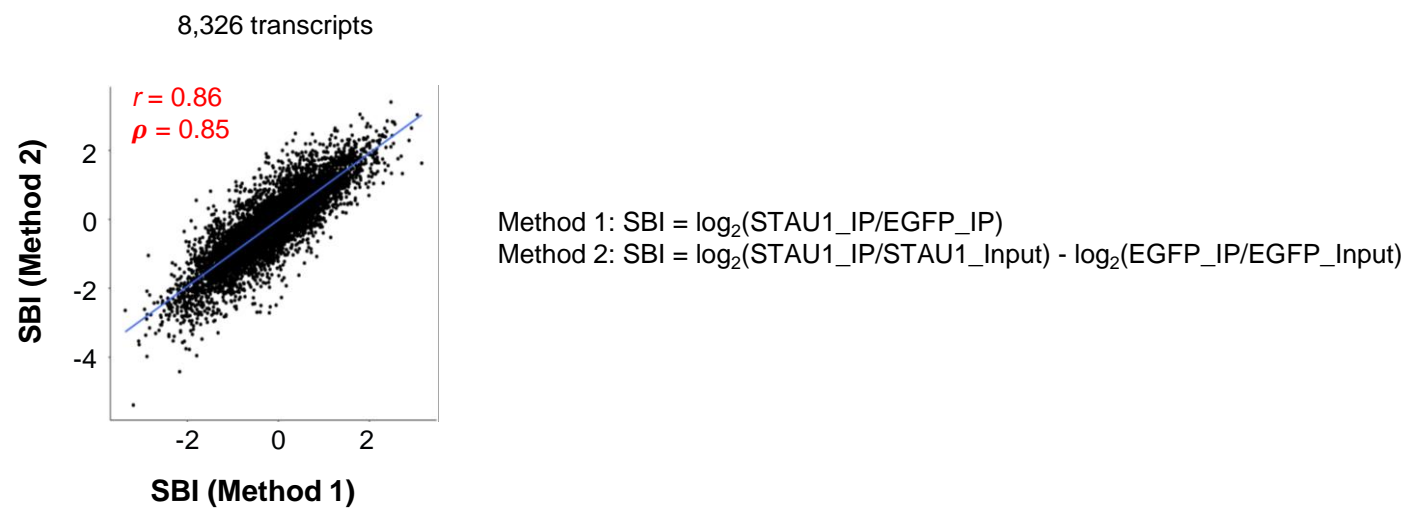

Fig. S2, Zheng, Cho, Wang et al.

A

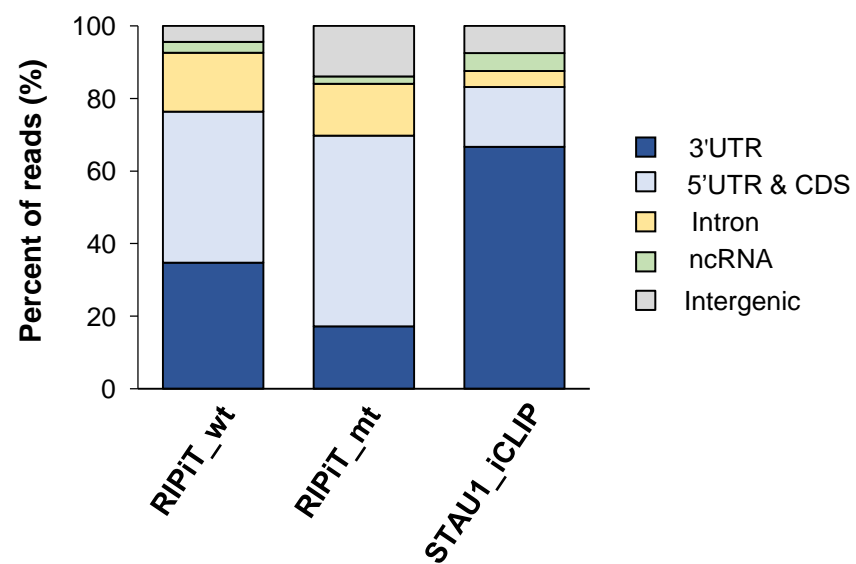

B

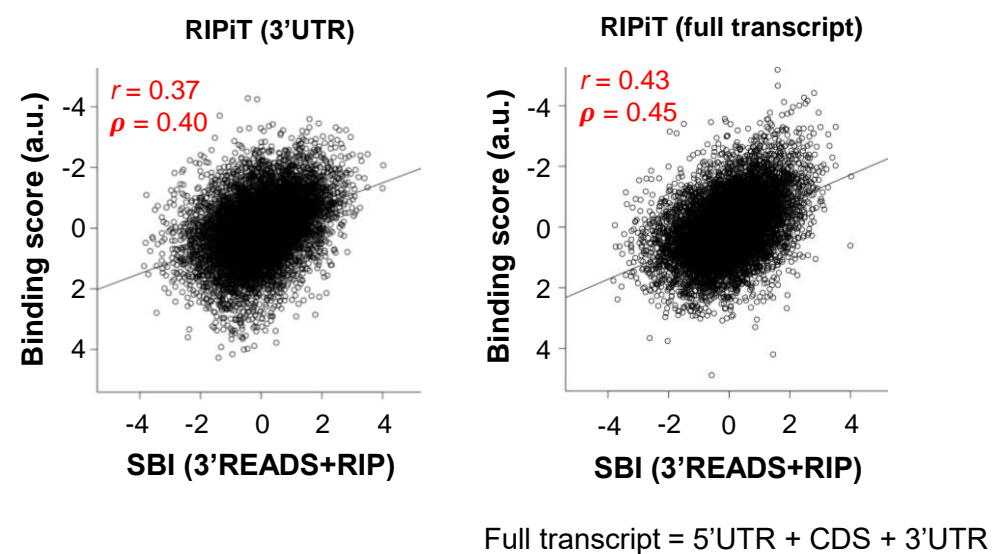

C

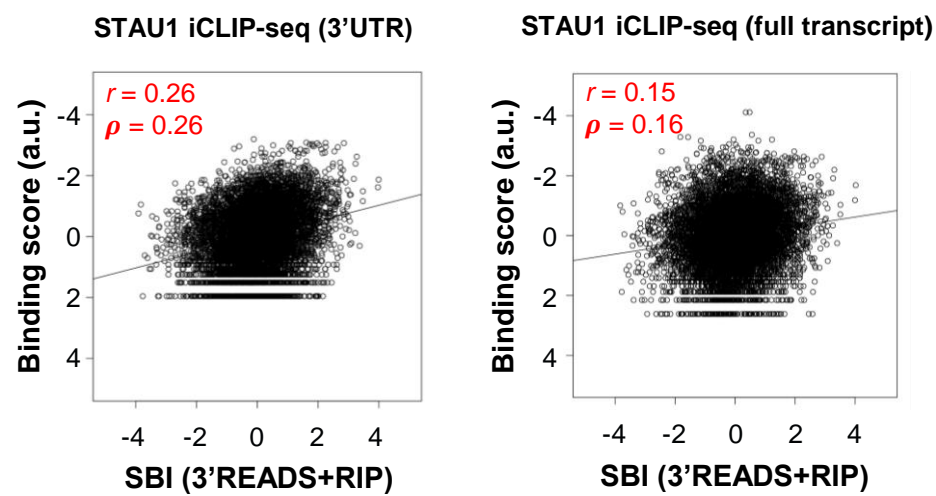

D

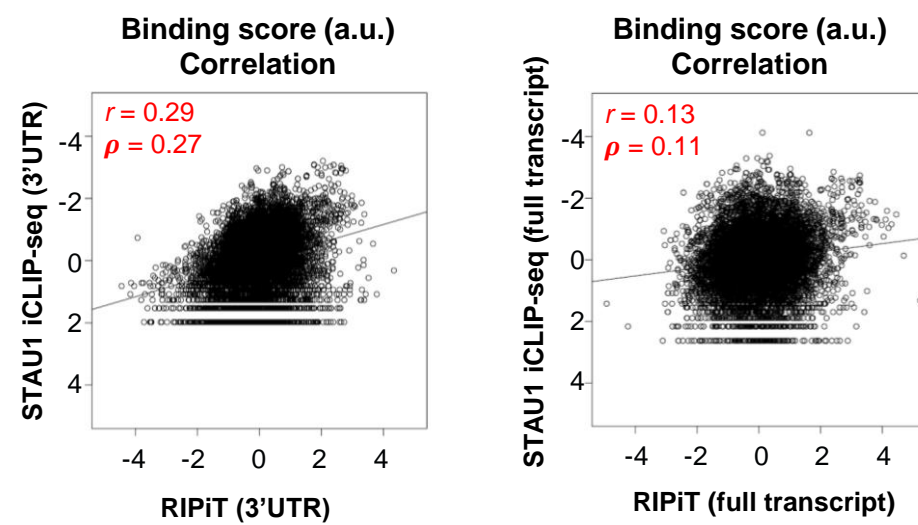

E

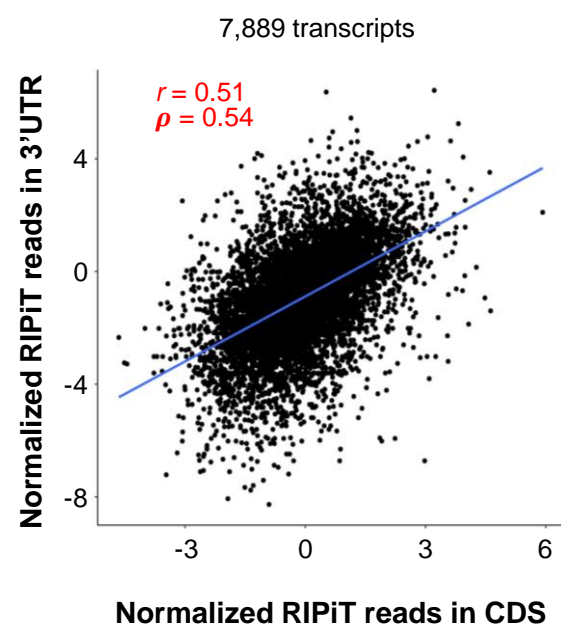

Fig. S3, Zheng, Cho, Wang et al.

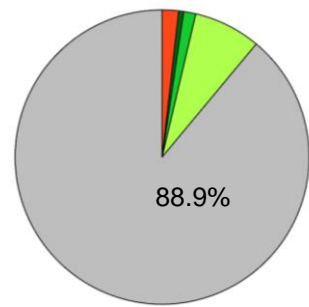

■ 0 (7,250) ■ ≥3 (44)  
■ 1 (601) ■ IRAlus (147)  
■ 2 (109)

STAU1-FLAG, IP

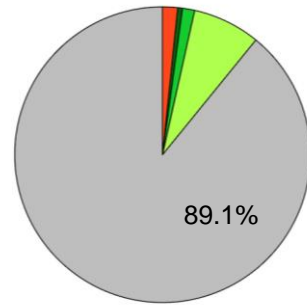

■ 0 (7,270) ■ ≥3 (42)  
■ 1 (602) ■ IRAlus (134)  
■ 2 (109)

FLAG-GFP, IP

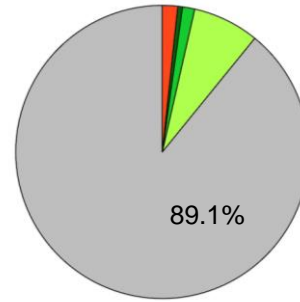

■ 0 (7,265) ■ ≥3 (42)  
■ 1 (596) ■ IRAlus (138)  
■ 2 (110)

STAU1-FLAG, input

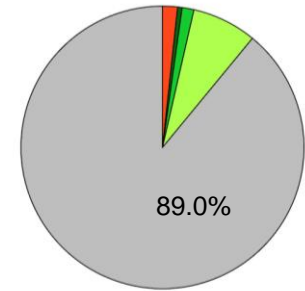

■ 0 (7,258) ■ ≥3 (42)  
■ 1 (602) ■ IRAlus (139)  
■ 2 (110)

FLAG-GFP, input

Fig. S4, Zheng, Cho, Wang et al.

A

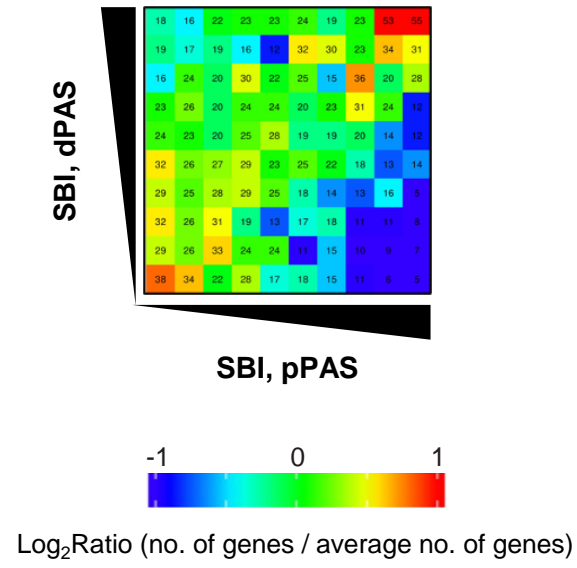

B

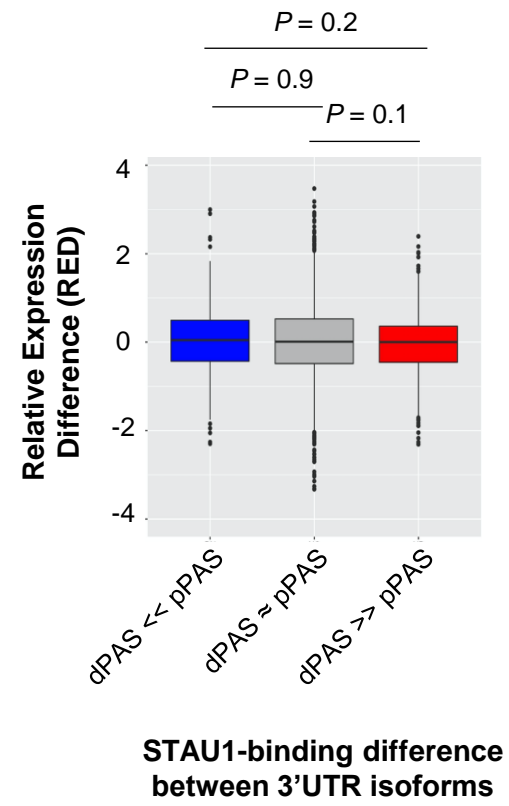

$$\text{RED} = \log_2(\text{dPAS}/\text{pPAS})^{\text{STAU1-FLAG}} - \log_2(\text{dPAS}/\text{pPAS})^{\text{FLAG-EGFP}}$$

Fig. S5, Zheng, Cho, Wang et al.

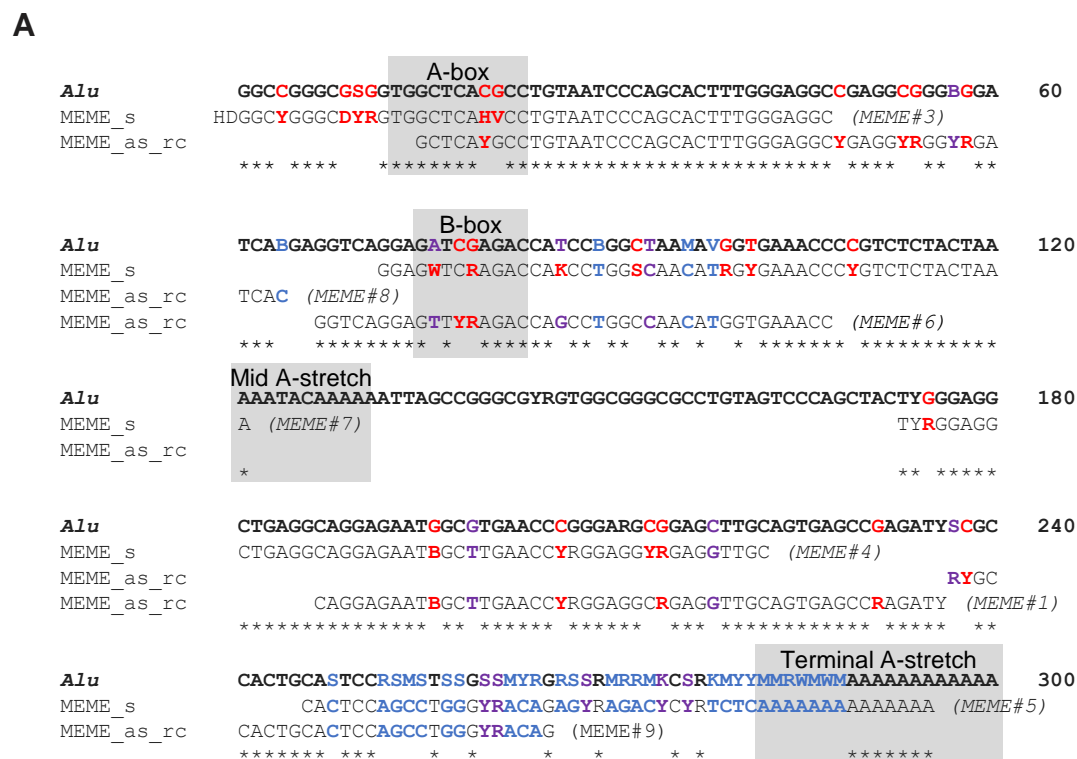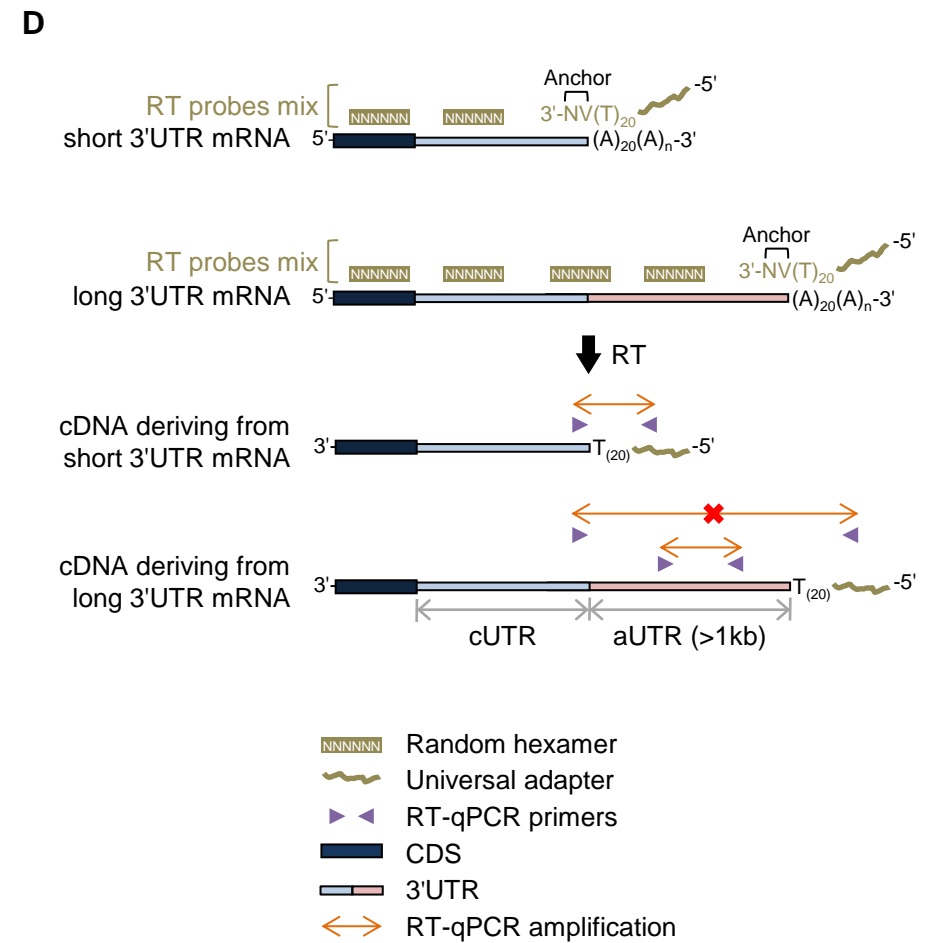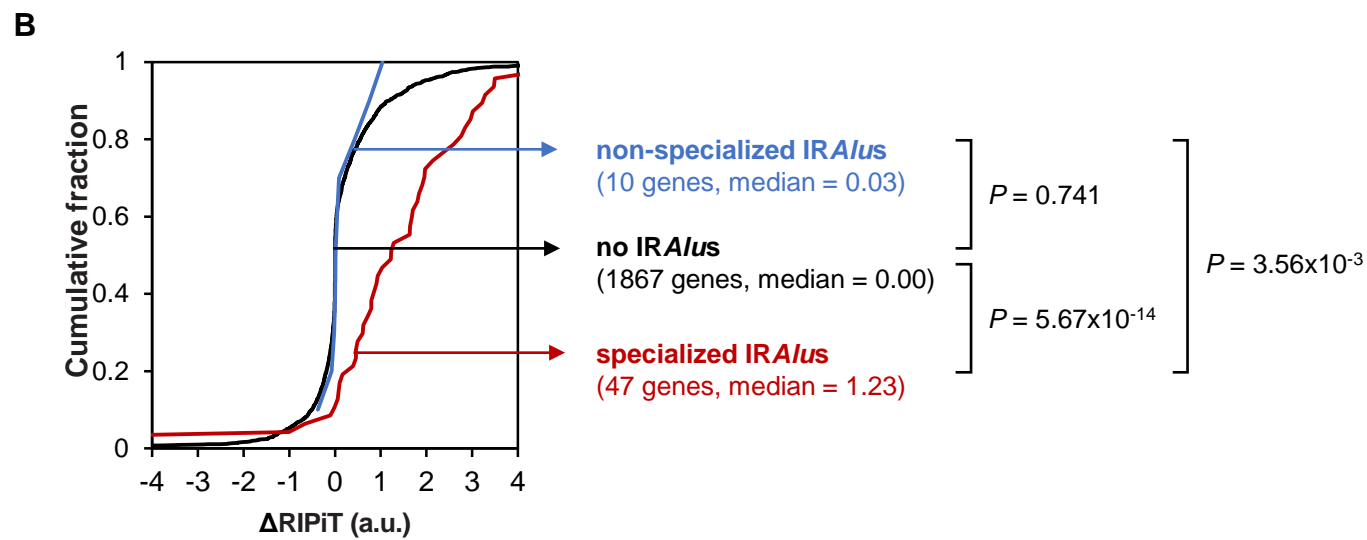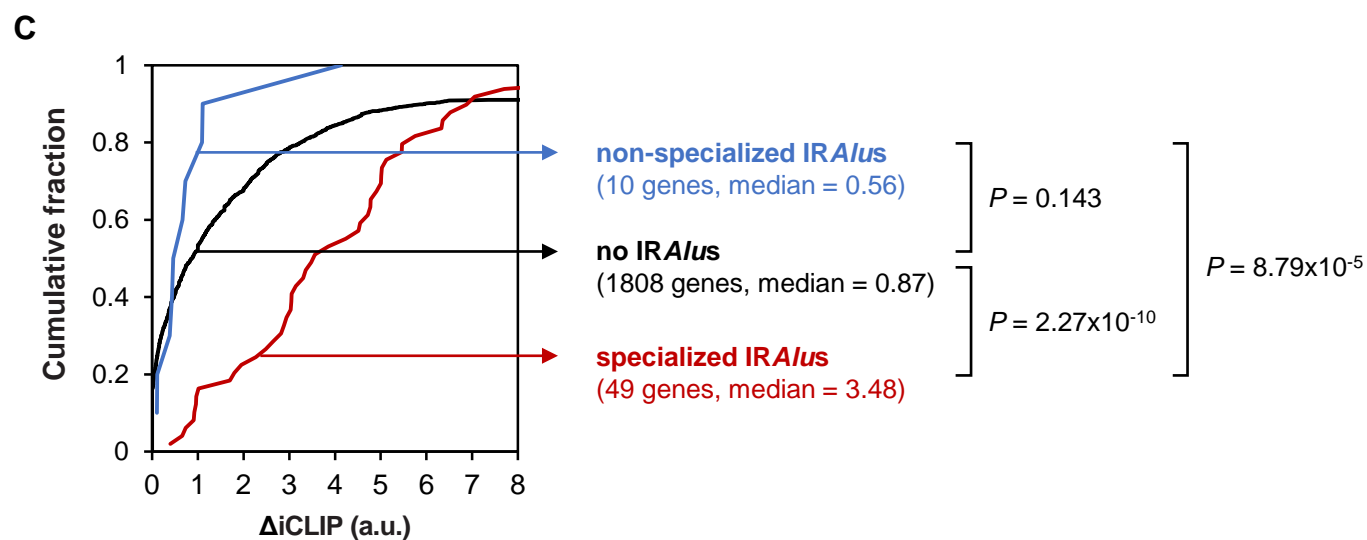

Supplement: supp_076133.120_Supplemental_Figures.pdf [file supp_076133.120_Supplemental_Figures.pdf]
